# Supplementary material for: Phylogenomic approaches untangle early divergences and complex diversifications of the olive plant family
Source: PubMed Central journal article supplement (PMC9040247; doi:10.1186/s12915-022-01297-0), 2022-04-25

Figure S1

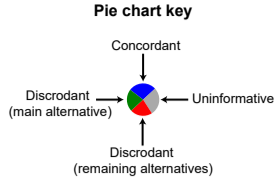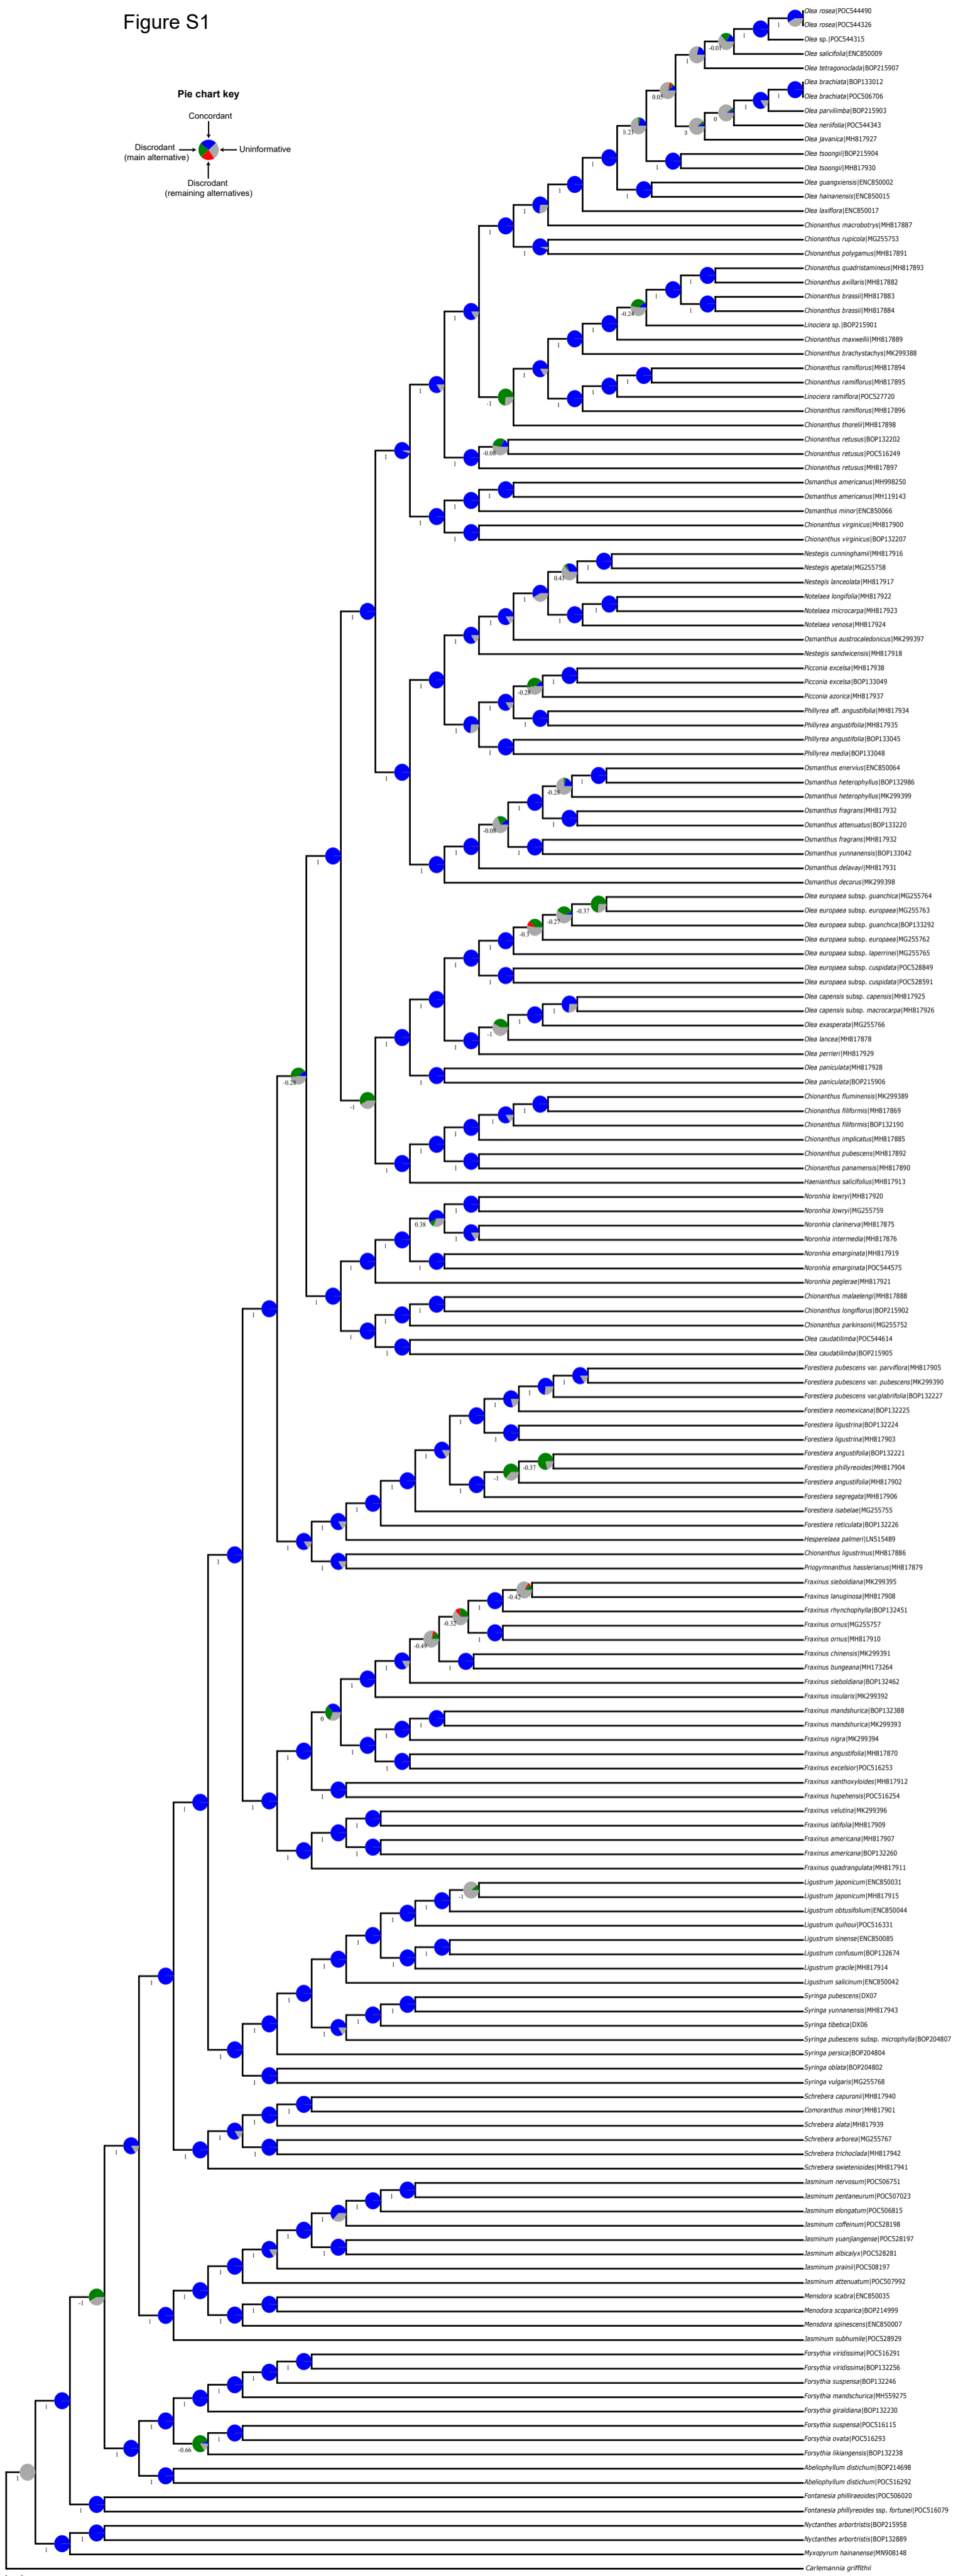

Figure S2

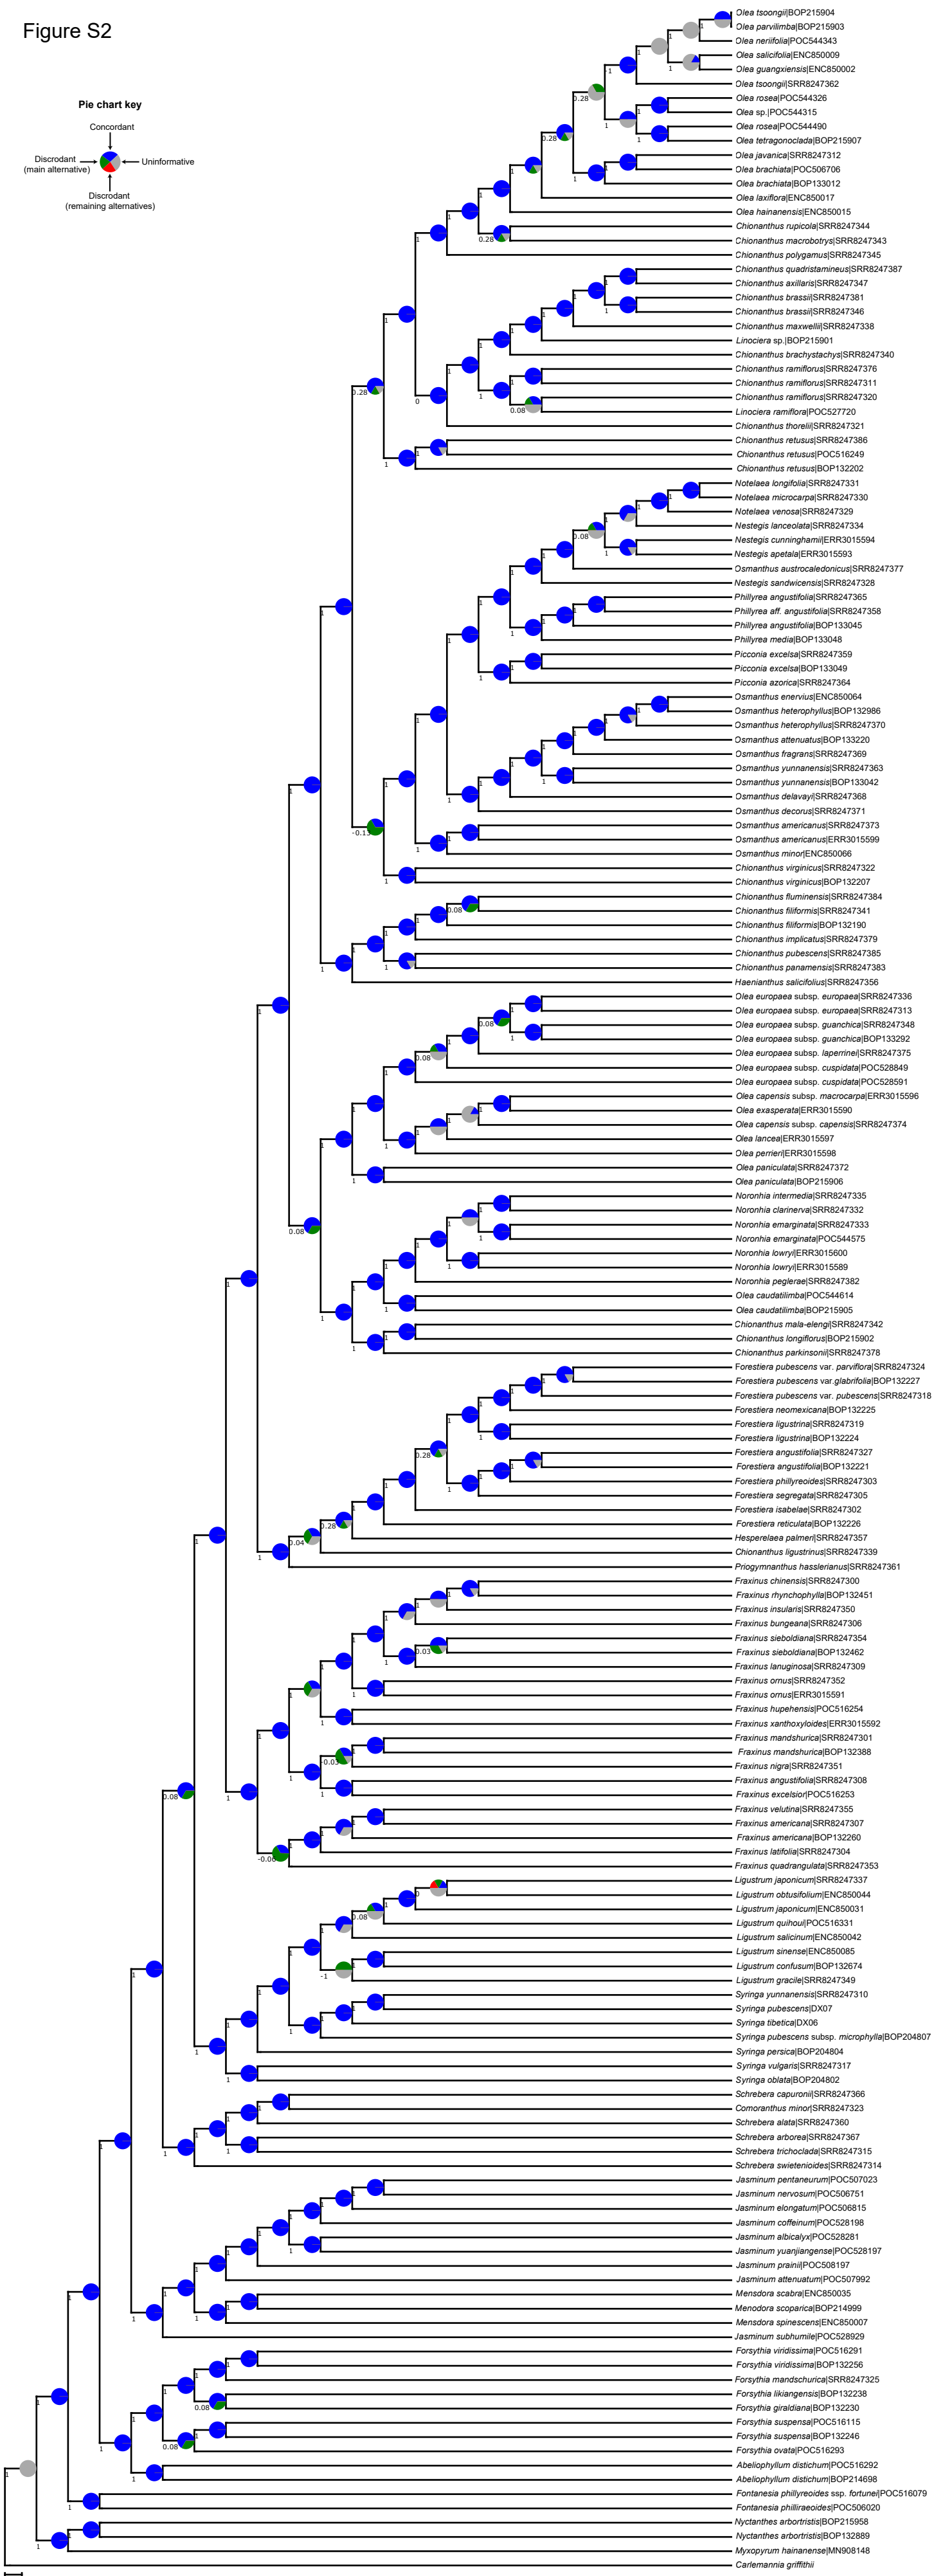

Figure S3

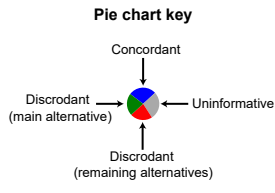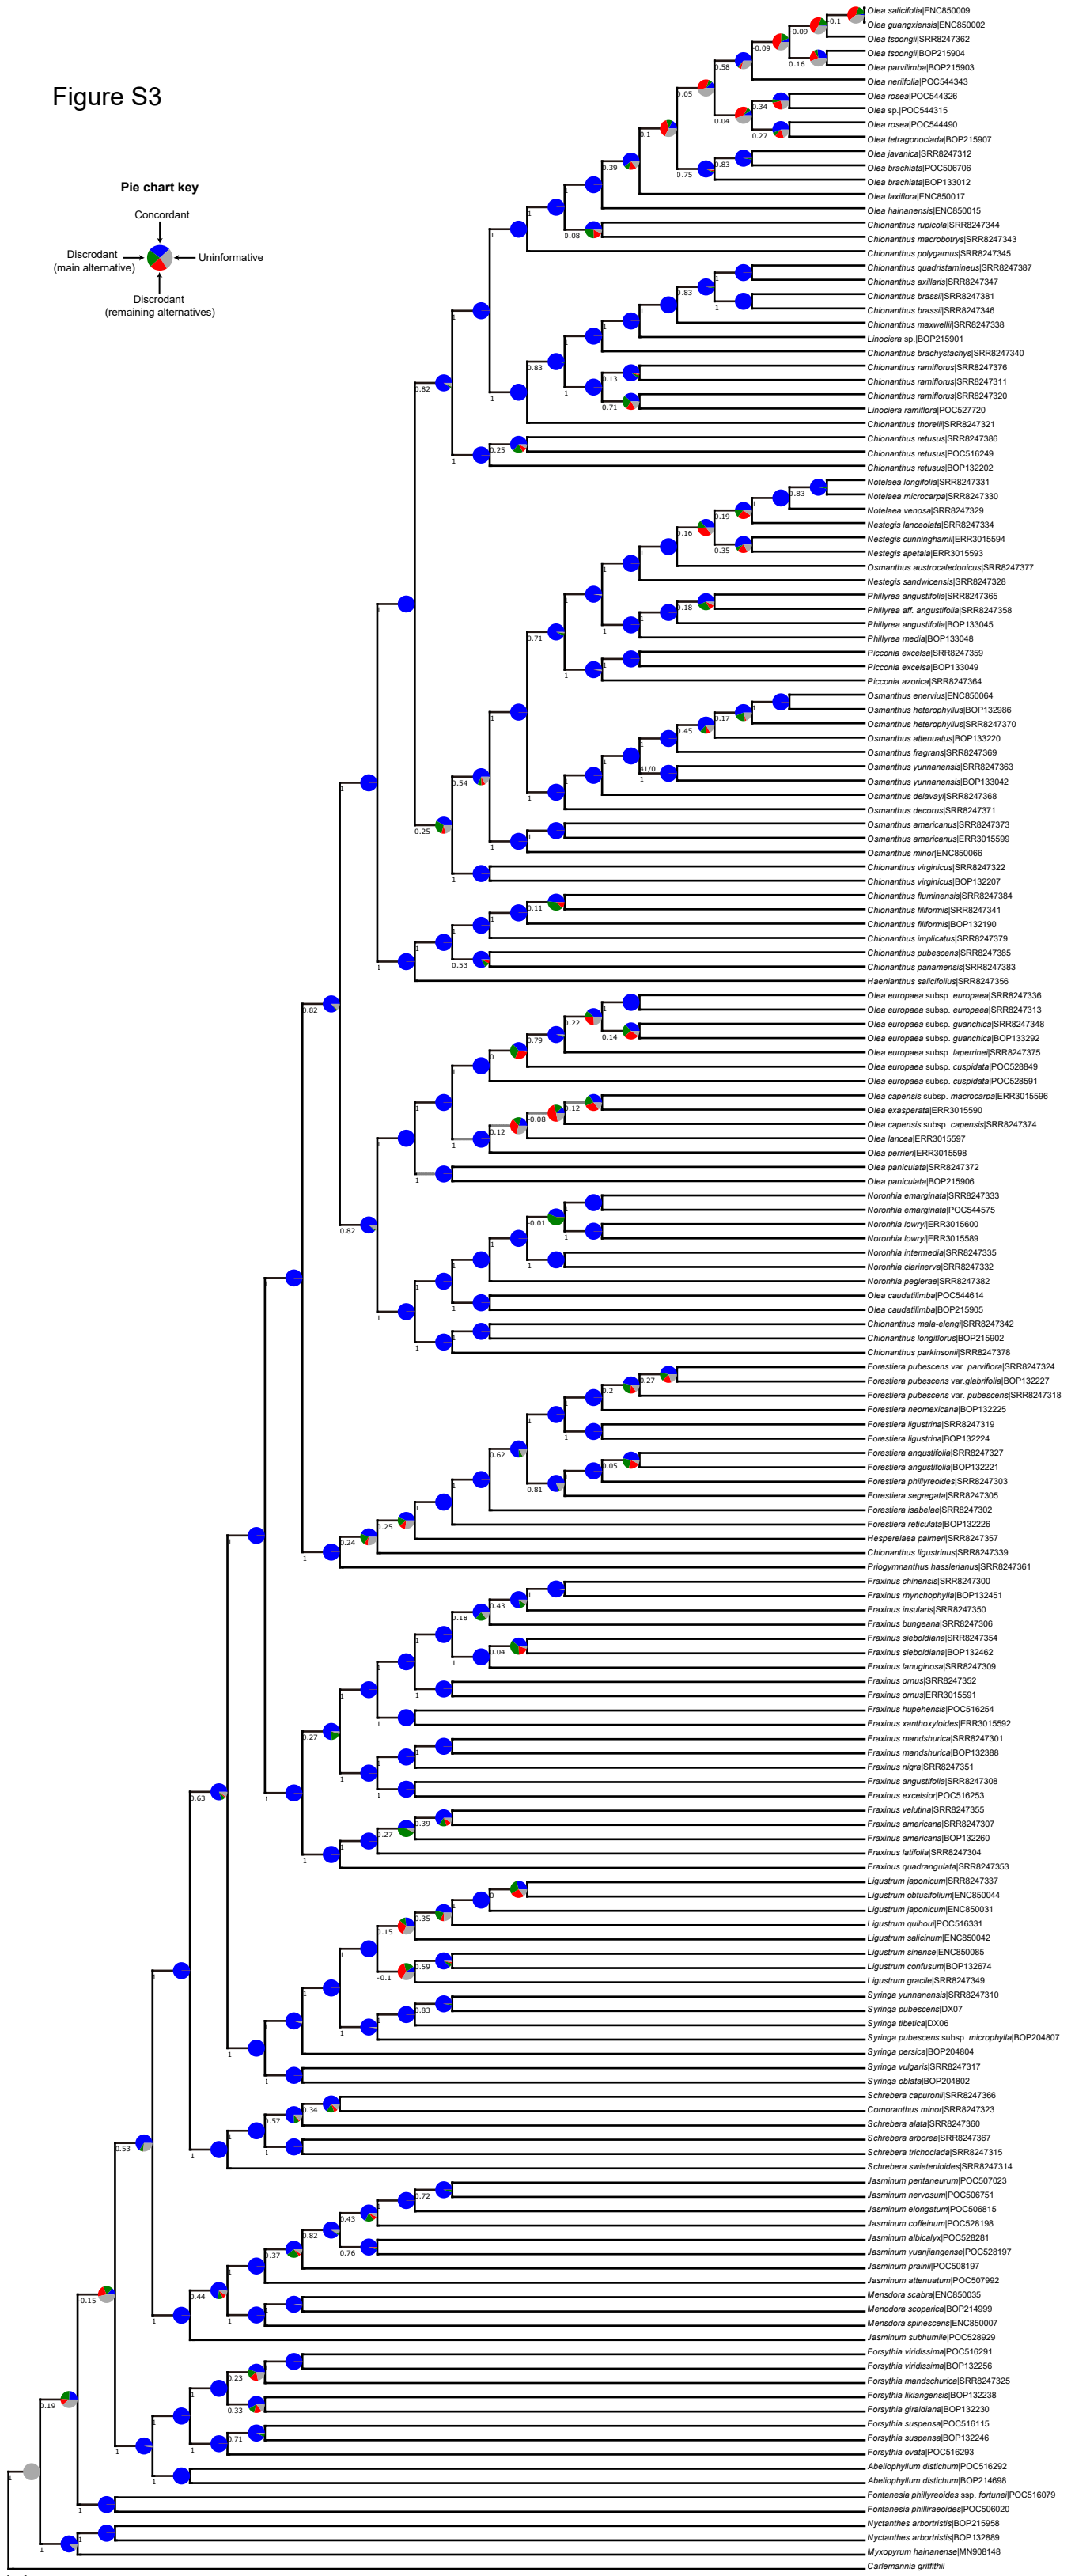

Figure S4

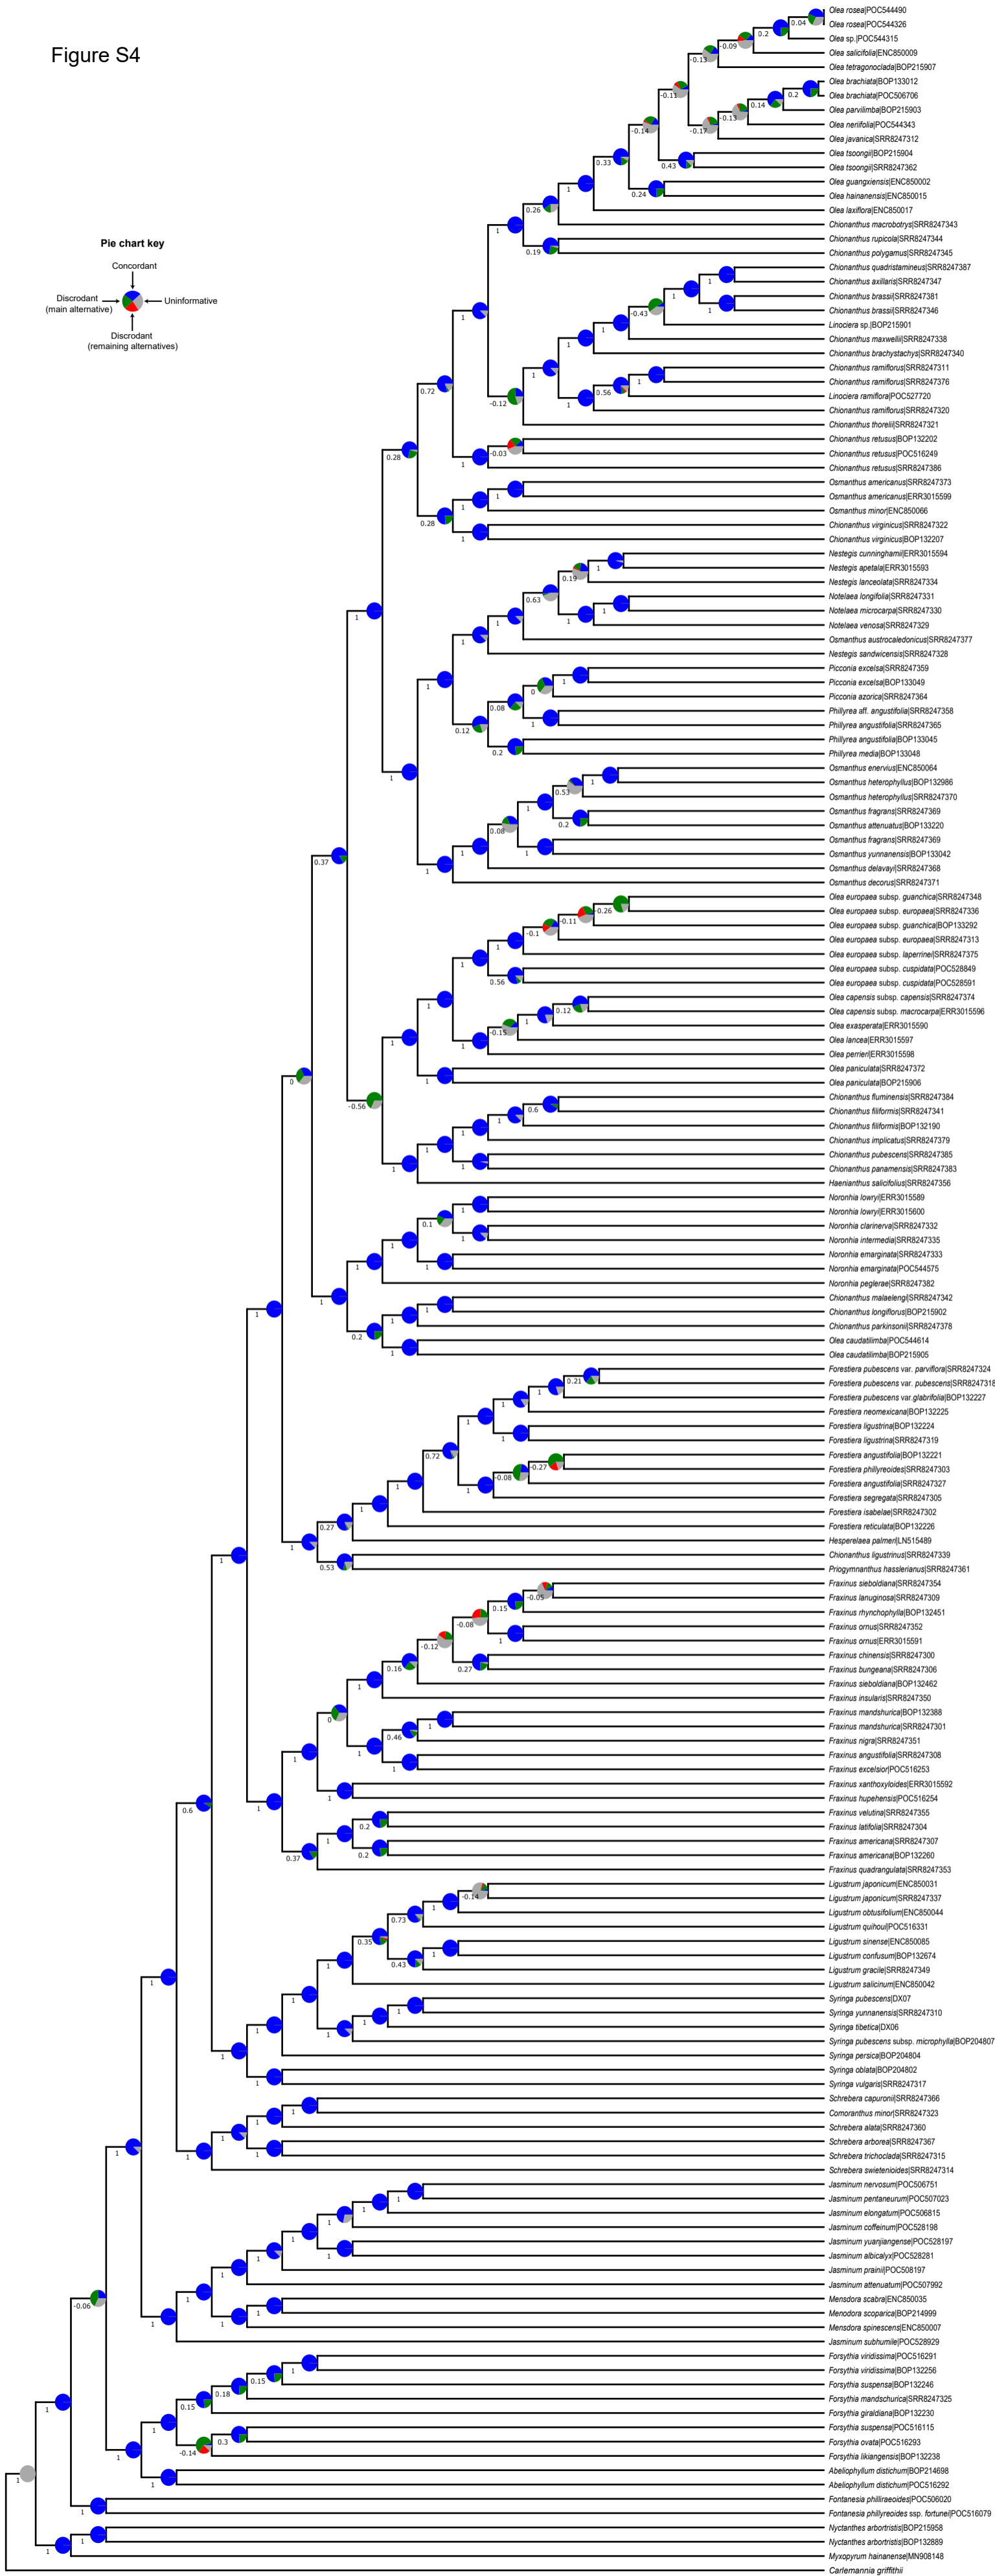

Figure S5

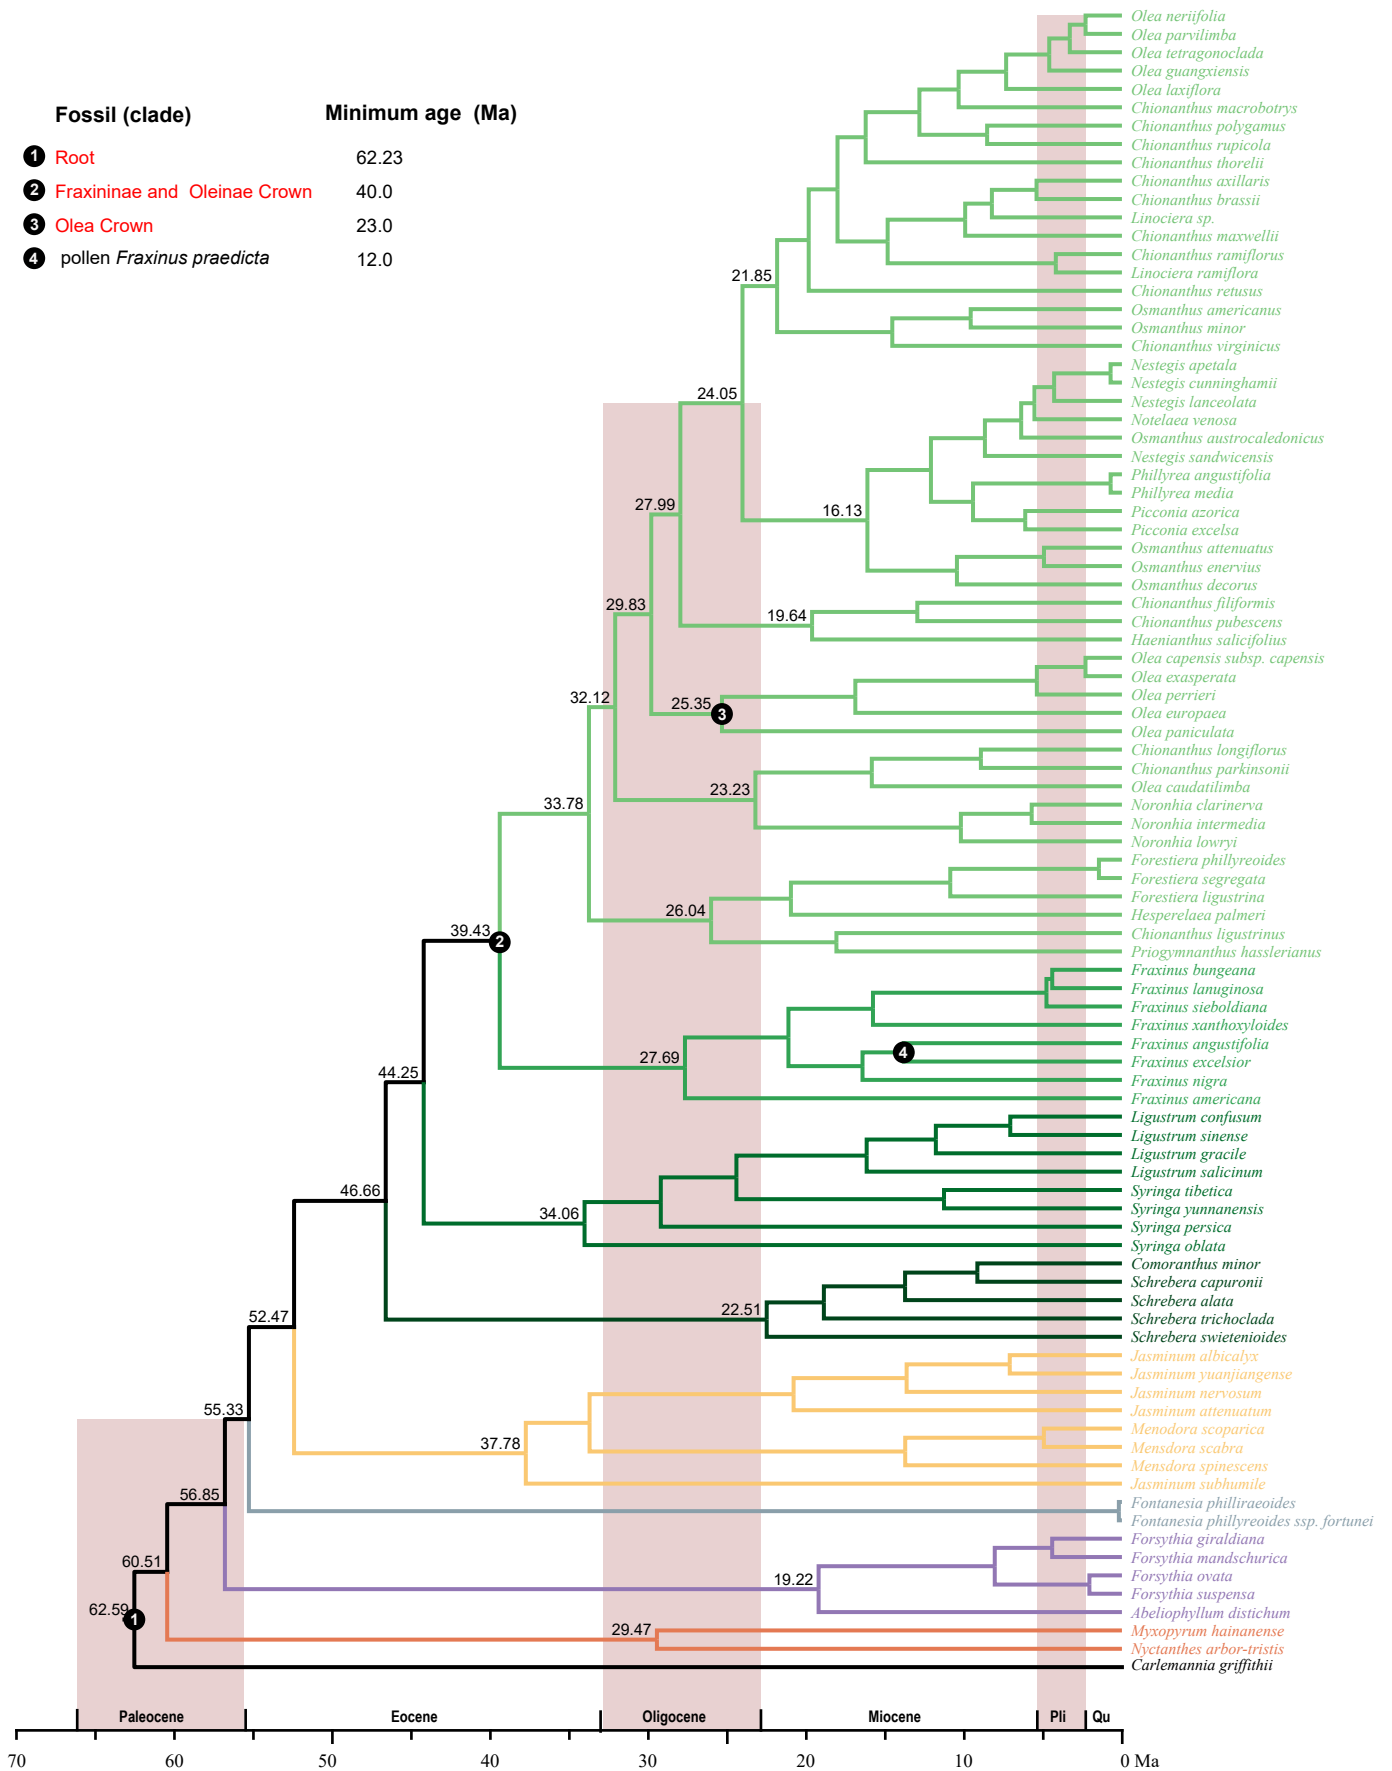

Supplement: 12915_2022_1297_MOESM2_ESM.pdf [file 12915_2022_1297_MOESM2_ESM.pdf]
